# Supplementary material for: Novel electron-type host material for unilateral homogeneous phosphorescent organic light-emitting diodes with low efficiency roll-off
Source: Royal Society of Chemistry journal article supplement (doi:10.1039/c2jm33988a), 2012-01-01
Supplement: c2jm33988a.pdf [file c2jm33988a.pdf]

Supporting information

**Novel Electron-type Host Material for Unilateral Homogenous  
Phosphorescent Organic Light-Emitting Diodes with Low Efficiency  
Roll-off**

*Xiao Yang<sup>a</sup>, Hong Huang<sup>a</sup>, Biao Pan<sup>a</sup>, Shaoqing Zhuang<sup>a</sup>, Matthew P. Aldred<sup>a</sup>, Lei Wang<sup>a\*</sup>, Jiangshan Chen<sup>b\*</sup>, Dongge Ma<sup>b</sup>*

<sup>a</sup>Wuhan National Laboratory for Optoelectronics, School of Optoelectronic Science and Engineering, Huazhong University of Science and Technology, Wuhan 430074, P. R. China.

<sup>b</sup>State Key Laboratory of Polymer Physics and Chemistry, Changchun Institute of Applied Chemistry, Graduate School of Chinese Academy of Sciences, Chinese Academy of Sciences, Changchun 130022, P. R. China

Email: [wanglei@mail.hust.edu.cn](mailto:wanglei@mail.hust.edu.cn); [jschen@ciac.jl.cn](mailto:jschen@ciac.jl.cn);

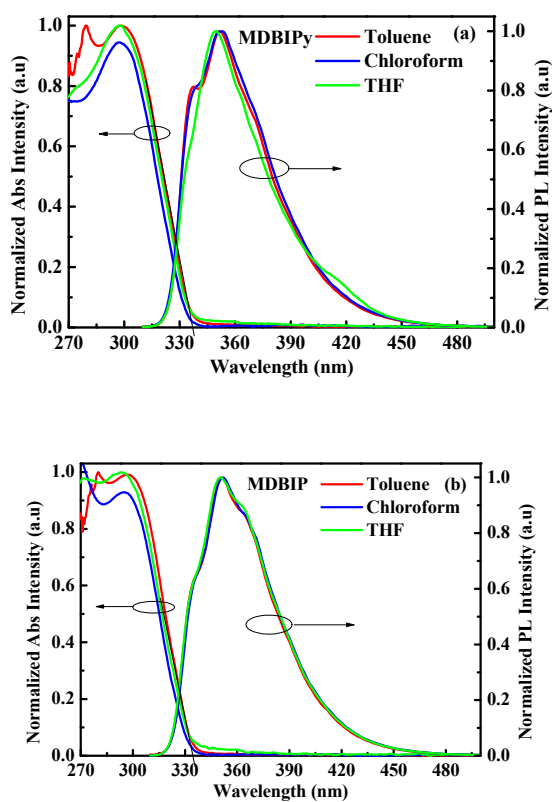

**Figure S1.** The PL spectrum of MDBIP and MDBIPy in different solvent.
